# Supplementary material for: The Impact of aerosol–ice nuclei-cloud interactions on a Typical Spring Dust-Precipitation Event in China
Source: Copernicus journal article supplement (doi:10.5194/egusphere-2025-4127), 2025-09-09
Supplement: Supplementary file [file egusphere-2025-4127-AC2-supplement.pdf]

**Dear editor and reviewers,**

Thank you for your thorough review of the manuscript. We have read the reviewer's comments carefully, and have responded and taken your comments into consideration and revised the manuscript accordingly. All the changes have been highlighted in the revised manuscript. Our detailed responses, including a point-by-point response to the reviews and a list of all relevant changes, are as follows:

**1. The logic contradiction. The discussions related to Figures 3 and 4 mentioned the reduction of mass concentration of ice crystal compared between T\_IN and T\_CCN (or between T\_CCN and T\_CTL), while the IN nucleation rate is increased in T\_IN run. Why does enhanced IN nucleation lead to reduced mass concentration of ice crystal? However, in some part of the text, the authors stated “more ice-phase cloud particles” (L442-444) and “cloud ice increases” (L345-347). The descriptions about the IN effects on ice microphysics are inconsistent in the manuscript, which makes me confused about the conclusions.**

**A:** Thank you for your careful review of the manuscript. We agree that the original manuscript did not clearly distinguish between changes in cloud-ice number concentration and mass concentration, which led to confusion in the interpretation of the ice-nucleation effects. We have carefully revised the manuscript and re-examined the cloud-ice budget to clarify this issue.

Our updated analysis shows that the impacts of dust-related ice nucleation on cloud ice differ across temperature layers.

Above 7 km (temperature below  $-17^{\circ}\text{C}$ ), the dust leads to a reduction in IN number concentrations. As a result, both production rate for heterogeneous nucleation (Pigen) and production rate for deposition- sublimation rate of cloud ice (Pidep) are suppressed, leading to decreases in both cloud-ice number concentration and mass concentration.

In contrast, between 4 and 7 km (temperature approximately  $-17^{\circ}\text{C}$  to  $2^{\circ}\text{C}$ ), the increase in ice nuclei enhances heterogeneous ice nucleation in T\_IN, thereby increasing the cloud-ice number concentration. However, the total cloud-ice mass concentration is reduced. This is because the increase in ice crystal number leads to a decrease in the effective particle size, reducing it to 77%-96% of that in T\_CTL which limits deposition- sublimation rate of cloud ice. Consequently, although more ice crystals are formed, their individual growth is suppressed, resulting in a reduction in cloud-ice mass.

We have revised the related text (e.g., Section 3.2 and 4) to explicitly distinguish between cloud-ice number concentration and mass concentration and to remove ambiguous expressions such as “cloud ice increases” without qualification. These revisions ensure a physically consistent interpretation of the IN effects on ice microphysics throughout the manuscript.

**2. The heterogeneous ice nucleation scheme. The authors mentioned at L201-202 that the parameterization of Jiang et al. (2016) was derived from dust events in Xinjiang, Huangshan, and Nanjing, China. But in the Introduction part, the authors cited from the same literature (Jiang et al., 2016) and wrote that the dust events were only observed in Huangshan and Nanjing. Please check the correct location of the dust events in the literature (Jiang et al., 2016). Moreover, if the authors are interested in the effects of dust particles on precipitation, why not chose an ice nucleation parametrization that developed base on the dust events occurred only over Xinjiang, which is much closer to the dust source area? As I know, Huangshan and Nanjing are not the major source of the dust events. The atmospheric condition of Huangshan is relatively clean and the main aerosol source of Nanjing could be the polluted aerosols. Even the dust event may pass through these places, the dust particles may be mixed with the local emitted aerosols (lie polluted ones) and make the ice nucleation being complicated.**

**A:** Thank you for pointing out this issue. We have carefully rechecked Jiang et al. (2016), and the observation sites in their study indeed include Xinjiang, Huangshan, and Nanjing. The description in the Introduction has been corrected accordingly.

In Jiang et al. (2016), aerosol samples were collected during both dust and non-dust periods at all three sites using a newly developed high-voltage electrostatic aerosol collector (HVEAC). Ice nucleation was subsequently simulated with a static vacuum water-vapor diffusion chamber to derive immersion-freezing parameterizations. The study provided three site-specific IN parameterizations as well as a general parameterization applicable across all regions, with the differences mainly lying in the empirical coefficients.

Regarding the choice of the parameterization used in our model, we adopt the scheme of Chen et al. (2019). Chen et al. (2019) refined the coefficients of the original Jiang et al. (2016) formulation and extended it to represent both deposition and immersion freezing.

Therefore, we chose the Chen et al. (2019) version of the parameterization rather than using only the Xinjiang-specific coefficients.

The manuscript has been revised in line 216-221:

The parameterization scheme selected here is developed by Jiang et al. (2016) and (Chen et al., 2019). It first developed by Jiang et al. (2016) based on dust events observed in Xinjiang, Huangshan, and Nanjing in China, using the static vacuum vapor diffusion chamber Frankfurt Ice nucleation Deposition freezing Experiment. Then some parameters of it was refined and extended it to represent both deposition and immersion freezing by Chen et al. (2019) .

**3. The horizontal resolution of 0.15° is too coarse for investigation of IN effects on precipitation from aspect of microphysics. And the output interval of 3 h is too long to analyze the IN nucleation and related microphysical processes.**

**A:** Thank you for this valuable comment. We agree that a horizontal resolution of 0.15 ° is relatively coarse for resolving detailed ice-nucleation–microphysics interactions. However, our study aims to investigate the regional-scale precipitation response to dust over East Asia. Similar or even coarser resolutions have been widely used in previous studies focusing on dust–precipitation interactions, for example, Zhang et al. (2021) using GEOS-Chem at  $2^{\circ} \times 2.5^{\circ}$  with 1-hourly output, and Luo et al. (2023) using WRF v4.0 at  $1^{\circ} \times 1^{\circ}$  with 6-hourly output.

Regarding the temporal output frequency, we appreciate your suggestion. In the original setup, we used a 3-hour output interval because the observational precipitation dataset from the China Meteorological Administration (CMA) provides 6-hour accumulated precipitation. Following your recommendation, we have rerun the simulations with 1-hour output intervals, and the 1-hour fields are now aggregated to match the 6-hour accumulated precipitation observations used for evaluation. This modification allows us to better resolve the temporal sequence of heterogeneous nucleation, cloud microphysical evolution. The manuscript has been revised accordingly.

The manuscript has been revised in line 295-296:

The model outputs 1-hourly precipitation data. To compare with the observed 6-hourly precipitation, the model outputs are temporally interpolated to the time stamps of the observations.

**4. The English grammar of the manuscript should be improved.**

**A:** Thank you for pointing out the need for language improvement. We have thoroughly revised the entire manuscript to enhance its clarity and grammatical accuracy.

such as line 70-95:

Compared with the relatively well-understood impacts of aerosols as CCN, the role of dust as IN is considerably more complex and remains poorly understood, with substantial uncertainties (Kaufman et al., 2002; Eastwood et al., 2008; Pan et al., 2017; Possner et al., 2017). Observational studies have reported diverse and sometimes contradictory relationships between dust and precipitation, depending on temporal scale, season, and environmental conditions. Temporal scale and seasonality play a critical role in shaping the observed relationships between dust and precipitation. At interannual scales, Han et al. (2008) found a significant negative correlation between dust storm frequency and precipitation over the Taklimakan Desert, whereas a positive correlation was observed at monthly scales, suggesting that dust–precipitation relationships are scale dependent. Seasonal contrasts have also been reported. Using long-term ground-based observations, Wang (2013) showed that dust aerosols tend to suppress precipitation over arid and semi-arid regions in spring but may enhance precipitation in summer. In addition to temporal variability, the impacts of dust on clouds and precipitation also exhibit strong regional and environmental dependence. In contrast, Naeger (2018) found that dust could enhance precipitation over Florida based on multi-sensor satellite observations and field campaigns. More recently, Hu et al. (2023) demonstrated that the impact of springtime dust on precipitation is strongly modulated by the presence of other aerosol types. Liu et al. (2024) analyzed the spatiotemporal patterns and trends of dust aerosols and precipitation and found that dust increases suppress precipitation over source regions such as the Gobi and Taklamakan deserts, but enhance precipitation in downwind areas like northern China. Overall, due to the multiple factors influencing precipitation beyond aerosols, it remains challenging to quantify the impact of dust on precipitation from observations alone (Zhou et al., 2016; Stier et al., 2024), highlighting the need for process-oriented numerical modeling studies with physically based aerosol–ice nucleation parameterizations.

## Specific Comments

**1. Section 2: The authors mentioned that “The aerosol size spectra have been divided into 12 size bins” (L148-149), and they also noticed that WDM6 scheme is a double moment (bulk) 6-class microphysics. I would like to know how a size-resolved aerosol scheme being coupled with a bulk microphysics?**

**A:** Thank you for the question. Although WDM6 is a bulk double-moment scheme, the heterogeneous ice nucleation process uses the size-resolved aerosol information from CUACE. Aerosols are predicted in 12 sectional bins. For heterogeneous nucleation, the IN number concentration is first computed for each relevant bin (bins 5–12) using Equation (2) and (3) as the aerosol diameter is large than  $0.5 \mu\text{m}$  in these bins. The number for each bin are then summed to obtain the grid-scale heterogeneous number production rate. And mass production rate of IN for each bin are then summed to obtain the grid-scale heterogeneous mass production rate. They are passed to the bulk WDM6 microphysics. Thus, the aerosol process is size-resolved, while the microphysical tendencies remain bulk, and the coupling is achieved through aggregation of all aerosol-bin contributions.

**2. Section 2.3: How are the advection of IN (that are not nucleated into ice crystals yet) with winds considered in the T\_IN test?**

**A:** Thank you for the question. The aerosol particles predicted by CUACE are transported by the model’s dynamical core through advection, diffusion, and sedimentation. At each time step, the heterogeneous ice nucleation rate is diagnosed locally from the transported aerosol fields together with the ambient temperature and supersaturation. Therefore, unactivated aerosols are then advected downstream by the winds, and whether they can serve as IN in downstream regions depends entirely on the local thermodynamic conditions there.

**3. L23-24: I don’t understand how the on-line aerosol-IN nucleation scheme modifies the density of IN.**

**A:** Thank you for pointing this out. In our model, the “density of IN” mentioned here refers to the concentration of activated ice nuclei, which is diagnosed within the microphysics scheme rather than being a transported aerosol variable.

The original WDM6 scheme and our on-line aerosol–IN nucleation scheme both compute the activated IN concentration using Equation (1)–(3). Therefore, changing the nucleation parameterization modifies the fraction of aerosols that are activated as IN, even though the aerosol concentration remains unchanged. This is why the on-line aerosol-IN nucleation scheme modifies the concentration of IN.

The manuscript has been revised in line 24-28:

Dust modifies the spatial distribution and number concentration of IN, affecting heterogeneous ice nucleation. Compared with the systematic underestimation in original WDM6, the peak values of nucleated INs can reach  $10^{-4} \text{ L}^{-1}$  with the improved scheme, which is closer to observations. Cloud ice is reasonably formed at altitudes between 4 and 7 km in height.

**4. L24-25: What is the definition of the number concentration of IN? Is that the number of dust particles with diameter exceeding a threshold (like  $0.5 \mu\text{m}$ )? Or is that the number of dust particles that can be activated into ice crystals under appropriate temperature and saturation conditions based on equations 2 and 3? And from which figure did the authors reach the conclusion that “INs reach  $10^3\text{-}10^4 \text{ L}^{-1}$  with the improved scheme”? I did not find the related discussions about the magnitude of IN number.**

**A:** Thank you for this important question. In this study, the number concentration of ice nuclei (IN) does not refer simply to the number of dust particles exceeding a fixed size threshold (e.g.,  $0.5 \mu\text{m}$ ). Instead, the IN number concentration is defined as the number of dust aerosol particles that have been activated into ice crystals under the local temperature and supersaturation conditions, as diagnosed by the heterogeneous ice nucleation parameterization based on equations 2 and 3.

Regarding the magnitude of IN concentrations, the spatial distribution and vertical profiles of nucleated IN number concentration are presented in Figures 2a–c. Figures 2a and 2b show the maximum nucleated IN number concentration during the dust–precipitation event, while Figure 2c shows the event-averaged vertical distribution. With the improved on-line aerosol–IN nucleation scheme (T\_IN), the maximum IN concentrations can locally reach  $10^3$ – $10^4$  L<sup>-1</sup> between 3 and 5 km altitude during intense dust influence, whereas the event-mean values are generally lower. We have clarified this distinction between maximum and averaged IN concentrations in the Section 3.1 in revised manuscript to avoid confusion.

**5. L29-30: “the ratio of cloud ice to cloud snow”: Is that “the ratio of mass concentration of ice crystal to that of snow”?**

**A:** Yes, the ratio of cloud ice to cloud snow is the ratio of mass concentration of ice crystal to that of snow. We have therefore removed this sentence from the manuscript to avoid confusion.

**6. L30-31: It is difficult to understand this sentence.**

**A:** Thank you for pointing this out. You are correct that the original statement is unclear and inconsistent with the revised results. After reanalyzing the cloud microphysical processes and updating the model outputs, this description is no longer valid. We have therefore removed this sentence from the manuscript to avoid confusion.

**7. L31-33: Please explain why “rainwater is decreased due to vapor competition between IN and cloud condensation nuclei”.**

**A:** Thank you for pointing this out. We agree that the original explanation stating was overly simplified and potentially misleading. We have therefore re-examined this issue using a detailed budget analysis and revised the explanation accordingly.



Our updated analysis shows that the reduction in rainwater in T\_IN is not caused by a direct competition for water vapor between IN and CCN. Instead, it primarily results from changes in cloud microphysical pathways induced by dust aerosols. Specifically, the introduction of the online aerosol-IN nucleation scheme enhances heterogeneous ice nucleation in between 4 and 7 km (temperature approximately  $-17^{\circ}\text{C}$  to  $2^{\circ}\text{C}$ ), leading to an increase in the number of small ice crystals.

And the warm-cloud condensation process ( $P_{\text{act}}$ ) below 4 km (temperature approximately  $-2^{\circ}\text{C}$  to  $18^{\circ}\text{C}$ ) is slightly weakened, reducing cloud-water production. The subsequent autoconversion and accretion from cloud water to rainwater ( $P_{\text{racw}}$ ) are also reduced. Therefore, both cloud-water and rainwater mixing ratios in T\_IN are 90%-95% of those in T\_CTL by approximately

The manuscript has been revised in line 35-37:

Below 4 km, dust suppresses the conversion of water vapor to cloud water and of cloud water to rain, reducing the liquid-phase hydrometeor content to 90–95% of T\_CTL.

**8. L60-62: Are there dust events in Huangshan and Nanjing, China?**

**A:** Thank you for pointing this out. Jiang et al. (2016) performed ice-nuclei measurements at three sites in China: Huangshan, Nanjing, and Xinjiang. Their observations showed that IN concentrations at all three sites were significantly higher during dust-influenced periods than during non-dust conditions.

In line 64-66:

Jiang et al. (2016) found that IN concentrations observed during dust events in Huangshan, Xinjiang and Nanjing were significantly higher than those during non-dust conditions.

**9. L69-73: Please explain why the relationship between precipitation events and dust storm frequency shows a significant negative correlation at interannual scales but a positive correlation at monthly scales.**

**A:** Thank you for the comment. The opposite correlations at different time scales have also been reported in previous observational studies. The key reason is that dust influences precipitation through different mechanisms at event scale versus climate (interannual) scale (Han et al., 2008).

At the event or monthly scale, dust storms are often accompanied by weak precipitation events. Although the precipitation amount per event is typically small (often less than 1 mm), the occurrence of dust storms and light precipitation events tends to coincide, which produces a positive correlation at the monthly scale.

However, at the interannual scale, the long-term presence of abundant dust aerosols over the Taklimakan Desert substantially increases the number of cloud condensation nuclei. This causes cloud water to be distributed over more droplets, reducing cloud droplet effective diameters and suppressing warm-rain formation. As a result, years with more frequent dust storms generally experience reduced precipitation, yielding a negative interannual correlation.

Thus, the positive correlation at monthly scales reflects the co-occurrence of dust storms with weak precipitation events, while the negative correlation at interannual scales reflects the long-term suppression of precipitation efficiency by excessive dust loading.

**10. L74-76: Please explain why “dust aerosols tend to suppress precipitation over arid and semi-arid areas in spring, while promoting it in summer”.**

**A:** Thank you for the comment. The opposite effects of dust aerosols on precipitation in spring and summer over arid and semi-arid regions have been reported

in previous observational studies (Wang, 2013). Satellite analyses show that the key difference arises from the seasonal changes in cloud optical properties and cloud microphysics.

In spring, clouds over these regions generally have relatively small optical thickness and low liquid water content. Dust loading is negatively correlated with cloud optical depth and cloud water path, indicating that the absorbing dust heats the cloud layer and reduces cloud water, thereby suppressing cloud development and precipitation. Cloud effective diameters also tends to increase, which further weakens warm-rain processes.

In summer, clouds are optically thicker and contain more condensate. Dust is positively correlated with cloud optical depth and cloud water path, suggesting that dust aerosols may enhance cloud growth under the moister and more convectively nucleated summer conditions, leading to increased precipitation. These contrasting relationships explain why dust tends to suppress precipitation in spring but enhance it in summer.

**11. L67-84: I did not find a clear logic in this paragraph. Please improve it.**

**A:** Yes, we have revised the corresponding description in Lines 70–95 as follows:

Compared with the relatively well-understood impacts of aerosols as CCN, the role of dust as IN is considerably more complex and remains poorly understood, with substantial uncertainties (Kaufman et al., 2002; Pan et al., 2017). Observational studies have reported diverse and sometimes contradictory relationships between dust and precipitation, depending on temporal scale, season, and environmental conditions. Temporal scale and seasonality play a critical role in shaping the observed relationships between dust and precipitation. At interannual scales, Han et al. (2008) found a significant negative correlation between dust storm frequency and precipitation over the Taklimakan Desert, whereas a positive correlation was observed at monthly scales, suggesting that dust–precipitation relationships are scale

dependent. Seasonal contrasts have also been reported. Using long-term ground-based observations, Wang (2013) showed that dust aerosols tend to suppress precipitation over arid and semi-arid regions in spring but may enhance precipitation in summer. In addition to temporal variability, the impacts of dust on clouds and precipitation also exhibit strong regional and environmental dependence. Case-based and regional observational studies further highlight the complexity of dust–cloud–precipitation interactions. Satellite and aircraft measurements by Rosenfeld and Bell (2011) indicated that dust aerosols reduce cloud droplet effective diameters and precipitation efficiency without significantly changing total cloud water content. In contrast, Naeger (2018) found that dust could enhance precipitation over Florida based on multi-sensor satellite observations and field campaigns. More recently, Hu et al. (2023) demonstrated that the impact of springtime dust on precipitation is strongly modulated by the presence of other aerosol types. Overall, due to the multiple factors influencing precipitation beyond aerosols, it remains challenging to quantify the impact of dust on precipitation from observations alone (Zhou et al., 2016; Stier et al., 2024), highlighting the need for process-oriented numerical modeling studies with physically based aerosol–ice nucleation parameterizations.

**12. L112-114: I don't understand what this sentence is used for.**

**A:** Yes, thank you for pointing this out. We cited Su and Fung (2018b) to illustrate that previous studies have attempted to explore dust–precipitation linkages in spring, but often under relatively weak dust conditions. In contrast, our study focuses on a typical spring dust–precipitation event, and places particular emphasis on the cloud microphysical pathways, especially the role of dust as ice-nucleating particles, together with direct comparisons to precipitation observations. The text has been revised to clarify this distinction.

The relevant descriptions have been added to the manuscript (Lines 122–128) to improve clarity:

The spring of 2012 is not a typical dust season, most dust storm concentrated in Mongolia. Therefore, the microphysical pathways through which dust affects precipitation during typical dust events remain insufficiently studied. In this study, we want to focus on the influence of typical dust storm on precipitation. In contrast, this study focuses on a representative spring dust–precipitation event and explicitly examines the cloud microphysical processes associated with dust-induced heterogeneous ice nucleation, together with direct comparisons to precipitation observations.

**13. L151-152: The horizontal resolution is 0.15° for the simulation in the present study. It is too coarse to investigate the IN effects on cloud and precipitation from the aspect of microphysics. Can the authors conduct the additional runs with fine resolution to see if the results are robust?**

**A:** Thank you for the suggestion. We agree that using a finer horizontal resolution would provide more detailed representations of cloud microphysical structures. The resolution of the current version of GRAPES/CUACE is consistent with the meteorology, aerosol and gas chemistry together with the emissions. In the future, we would try our hard to improve the resolution. But currently, we have to use this resolution.

And, the objective of the present study is to investigate the regional-scale effects of dust-induced heterogeneous ice nucleation on precipitation over East Asia rather than the storm-scale cloud microphysics. For this purpose, the 0.15 ° resolution used in GRAPES/CUACE is consistent with many previous regional studies of aerosol–cloud–precipitation interactions, including those examining dust impacts (e.g., (Zhang et al., 2021), at  $2^{\circ} \times 2.5^{\circ}$ ). At this scale, the model is able to capture the large-scale transport of dust aerosols, their interaction with clouds, and the resulting precipitation response.

14. L167-169: I don't understand this sentence. In the original WDM6 scheme, is only the nucleation of ice from vapor considered (like condensation freezing and deposition nucleation)? How about the other ice nucleation schemes, like immersion freezing, contact freezing, and homogeneous freezing?

A: Thank you for raising this important question. In the original WDM6 scheme, the number concentration of ice nuclei is diagnosed solely as a function of temperature, and the production rate for heterogeneous nucleation ( $P_{igen}$ ) is computed accordingly. In the original WDM6 scheme, heterogeneous nucleation consumes water vapor to form cloud ice.

After introducing the on-line aerosol-IN nucleation scheme, heterogeneous ice nucleation processes are explicitly distinguished. Specifically,  $P_{inud}$  represents deposition and condensation freezing, which consume water vapor to form cloud ice;  $P_{inui}$  represents immersion freezing, which consumes cloud water to form cloud ice. These two components together constitute  $P_{igen}$  in the updated On-line aerosol-IN nucleation scheme. Homogeneous freezing is treated separately following the original WDM6 formulation, while contact freezing is not explicitly modified in this study.

The relevant descriptions have been added to the manuscript (Lines 45–46) to improve clarity.

In the original WDM6 scheme, when the temperature is below 0 °C, the production rate of cloud ice is attributed to two processes: heterogeneous nucleation ( $P_{igen}$ ) and deposition- sublimation rate of cloud ice ( $P_{idep}$ ). Both consume water vapor to form ice clouds.

In Lines 234 -235:

$P_{inud}$  depletes water vapor to form cloud ice, while  $P_{inui}$  depletes cloud water to form cloud ice.

**15. L169-172: Did the nucleation of IN consume water vapor in the original WDM6 scheme? I didn't find the effect of water vapor on the ice nucleation from equation (1).**

**A:** Thank you for this valuable comment. In the original WDM6 scheme, Equation (1) lack explicit water vapor dependency. The reviewer is correct that Eq. (1) solely calculates the nucleated ice nuclei number concentration based on temperature. The conversion of this ice nuclei number to heterogeneous ice nucleation rate and the associated water vapor consumption are handled in subsequent steps of the scheme, as expressed by:

$$q_{I0}(kg\ m^{-3})= 4.92 \times 10^{-11} N_{ice}^{1.33}$$

$$P_{igen}(kg/kg/s)= \frac{(q_{I0}-q_I)}{\Delta t}$$

Where,  $q_{I0}$  represents the cloud-ice mixing ratio (kg/kg),  $q_I$  is the existing cloud-ice mixing ratio (kg/kg),  $\rho$  is the air density, and  $\Delta t$  is the model time step (100 s). During each time step, the water vapor mixing ratio decreases by  $P_{igen} \times \Delta t$ , while the cloud-ice mixing ratio increases by the  $P_{igen} \times \Delta t$ . Therefore, although water vapor does not explicitly appear in Eq. (1), the vapor depletion is explicitly accounted for in the microphysics budget of the WDM6 scheme through the Pigen process.

In line 178-181:

In the original WDM6 scheme, when the temperature is below 0 °C, the production rate of cloud ice is attributed to two processes: heterogeneous nucleation (Pigen) and deposition-sublimation rate of cloud ice (Pidep). Both consume water vapor to form ice clouds.

**16. L178-180: This sentence is difficult to understand.**

**A:** Yes, We have revised the original writing In line 188-196:

Heterogeneous nucleation mechanisms are generally classified into immersion freezing, condensation freezing, deposition nucleation, and contact freezing (Hiranuma et al., 2015; Ilotoviz

et al., 2016; Lee et al., 2017). Among these mechanisms, immersion freezing, condensation freezing, and deposition nucleation are selected, as they are relatively well developed. This selection is based on the fact that dust aerosols primarily affect ice nucleation at temperatures below 258.15 K through these three mechanisms (Cantrell et al., 2013; Patnaude et al., 2025), whereas the efficiency of contact freezing by dust particles is relatively low (Niehaus et al., 2014).

**17. L192-193: There is no “ $\Delta t$ ” in equation (2).**

**A:** Thank you for the question. Indeed, in the original formulation of DeMott et al. (2015), Equation (2) does not include a time-step term ( $\Delta t$ ).

Within the original WDM6 microphysics scheme, this conversion from IN number concentration to IN nucleation rate is required to couple the parameterization into the prognostic microphysics equations. The rate of heterogeneous ice nucleation is expressed as:

$$N_{inui}(m^{-3}s^{-1}) = N_{icenui}/\Delta t$$

where  $\Delta t$  is the model time step (100 s). Therefore, Equation (2) in our paper directly follows the functional form of DeMott et al. (2015) for calculating  $N_{inui}$ .

**18. L194-195: Why do the deposition nucleation and condensation freezing only occur at temperature between 248.15 K and 258.15 K. This temperature range seems too narrow.**

**A:** Thank you for the question. The implementation of these nucleation schemes in our model, including the specific temperature range of 248.15 K to 258.15 K for deposition nucleation and condensation freezing, follows the work of (Chen et al., 2019). In their study, Chen et al. adopted and applied the parameterization schemes from (Jiang et al., 2016) for deposition nucleation and condensation freezing and (DeMott et al., 2017) for immersion freezing, specifically to simulate dust-hail interactions in East Asia. The temperature range in question is from the original Jiang et al. (2016) scheme, which was based on their observational analysis.

We have revised the corresponding description in Lines 209–220 as follows:



Deposition and condensation freezing are both heterogeneous ice nucleation processes that occur at temperatures between 248.15 K and 258.15 K (Chen et al., 2019).

The parameterization scheme selected here is developed by Jiang et al. (2016) and (Chen et al., 2019). It first developed by Jiang et al. (2016) based on dust events observed in Xinjiang, Huangshan, and Nanjing in China, using the static vacuum vapor diffusion chamber Frankfurt Ice nucleation Deposition freezing Experiment. Then some parameters of it was refined and extended it to represent both deposition and immersion freezing by Chen et al. (2019) .

**19. L198-200: Please provide the evidence for this sentence.**

**A:** Thank you for question. This study references the findings of Chen et al. (2019). For immersion freezing, the size of an initial ice crystal is influenced by the size of the droplet from which it forms; specifically, the initial ice crystal size corresponds to the droplet size. For Deposition and condensation freezing, the process initiates from the smallest droplet size bin. However, since the GRAPES/CUACE model does not employ a bin microphysics scheme for droplets, this study distinguishes between these two freezing mechanisms by setting a small initial size for the cloud ice particles generated via this pathway.

Moreover, DeMott et al. (2015) have demonstrated that immersion freezing is the predominant mode of heterogeneous nucleation in the atmosphere, whereas deposition and condensation freezing are relatively more difficult to occur.

We have revised the corresponding description in Lines 213–216 as follows:

The initial size of the ice crystals is comparable to that of the smallest droplets (Chen et al., 2019), and the ice formation through these two pathways is generally harder than that through immersion freezing (DeMott et al., 2015).

20. L207: What are the physical meaning for “ $\rho$ ” and “ $q_{I0}$ ”?

A: Thank you for the question.  $\rho$  denotes the air density ( $\text{kg m}^{-3}$ ), and  $q_{I0}$  is the predicted ice mixing ratio after accounting for newly formed ice from heterogeneous nucleation ( $\text{kg kg}^{-1}$ ).

In WDM6 scheme, production rate for heterogeneous nucleation is calculated as the difference between  $q_{I0}$  and the current ice mixing ratio ( $q_I$ ):

$$P_{igen} = \frac{(4.92 \times 10^{-11} N_{ice}^{1.33} - q_I) \rho}{\Delta t}$$

where  $P_{igen}$  is the production rate of cloud-ice mass by heterogeneous nucleation ( $\text{kg kg}^{-1} \text{s}^{-1}$ ), and  $\Delta t$  is the model time step (100 s).

We have revised the corresponding description in Lines 224–230 as follows:

WDM6 uses the formula  $\rho q_{I0} (\text{kg m}^{-3}) = 4.92 \times 10^{-11} N_{ice}^{1.33}$  and  $P_{igen} (\text{kg kg}^{-1} \text{s}^{-1}) = \frac{(q_{I0} - q_I)}{\Delta t}$  to calculate nucleation of ice from vapor due to the IN increase. Where,  $\rho$  denotes the air density, and  $q_{I0}$  is the predicted ice mixing ratio after accounting for newly formed ice from heterogeneous nucleation ( $\text{kg kg}^{-1}$ ). production rate for heterogeneous nucleation is calculated as the difference between  $q_{I0}$  and the current ice mixing ratio ( $q_I$ ). However, it does not account for the influence of nucleated IN size or the specific characteristics of different heterogeneous ice nucleation mechanisms on ice crystal development.

21. L212: Does “ $\rho_i$ ” mean the density of ice? Why take the value of 500  $\text{kg/m}^3$ ?

A: Yes,  $\rho_i$  mean the density of cloud ice. We used a constant value of 500  $\text{kg m}^{-3}$  following Park and Lim (2023). This value is also well-established in the literature and has been used in other research (Reisner et al., 1998; Morrison and Gettelman, 2008).

22. Equation (5): Please provide the reference for equation (5).

A: Yes, We have revised the original writing into line 243-246:

Considering ice crystals generally grow from smaller particles and the radius of initial ice crystal size are often smaller than observed values, and with reference to the bin sizes of aerosol particles in CUACE (Um et al., 2018; Chen et al., 2021; Yang et al., 2021), this study assumes the ice crystal radius of  $r_{df}$  and  $r_{if}$  to be:

23. L252-255: It is difficult to understand this sentence.

A: Thank you for pointing this out. We have revised the sentence to make our intention clearer. The purpose is to explain that, based on previous radar and modeling studies showing that dust mainly participates in cloud-ice processes between mid-tropospheric layer (-20 - 0 °C), the simulated dust distribution in this altitude range is used in our study to determine the dust-affected region.

We have revised the corresponding description in Lines 251–255 as follows:

Considering that many radar observations and model studies have indicated that dust mainly participates in within the mid-tropospheric layer (-20 - 0 °C) between 4 and 7 km in altitude (Haarig et al., 2019; He et al., 2021; He et al., 2023), Fig. 1c also shows the simulated dust within this layer.

24. L264-265: The output interval of 3 h is too long to investigate the microphysical effects of IN. The cloud system might change evidently during this time period.

A: We completely agree that the 3-hour output interval was too coarse to accurately resolve the microphysical processes influenced by IN. The original setting was primarily chosen to match the 6-hour cumulative precipitation data from the China Meteorological Administration used in our initial analysis.

Following your suggestion, we have rerun the model with a 1-hour output interval. To precisely align with the observed dust-precipitation events, we

interpolated the model results from the hour before and after to the exact observation time. All analyses in the revised manuscript pertaining to the temporal evolution of cloud microphysics now utilize this new, high-frequency (1-hour) dataset.

We have revised the corresponding description in Lines 264–265 as follows:

The model outputs 1-hourly precipitation data. To compare with the observed 6-hourly precipitation, the model outputs are temporally interpolated to the time stamps of the observations.

**25. L272:** As I know, there are three types of horizontal resolution of NCEP FNL data, i.e., 2.5°, 1°, and 0.25°. Please provide the link for the NCEP FNL data with resolution of 0.15°.

**A:** Yes, You are correct that the NCEP FNL dataset is available at spatial resolutions of 2.5 °, 1 °, and 0.25 °, rather than 0.15 °.

We have revised the corresponding description in Lines 301–303 as follows:

The initial and boundary meteorological conditions for GRAPES/CUACE are obtained from the NCEP/NCAR Final Operational Global Analysis (FNL) data, with a temporal resolution of 6 hours and a spatial resolution of 0.25 °.

For completeness, we have also added the official data access link in the revised manuscript:

The NCEP/NCAR Final Operational Global Analysis (FNL) data, with a temporal resolution of 6 hours and a spatial resolution of 0.25°(<https://rda.ucar.edu/datasets/ds083.3/>).

**26. L293:** The equation of aMAPE has been introduced in equation (8).

**A:** Yes. We have revised the corresponding description in Lines 324–330 as follows:

The *aMAPE* is used to evaluate whether the simulated precipitation is overestimated or underestimated compared with the observation. When  $aMAPE > 0$ , precipitation is overestimated; when  $aMAPE < 0$ , precipitation is underestimated.

**27. L293-294: It is difficult to understand this sentence.**

**A:** Yes. We have revised the corresponding description in Lines 324–330 as follows:

The *aMAPE* is used to evaluate whether the simulated precipitation is overestimated or underestimated compared with the observation. When  $aMAPE > 0$ , precipitation is overestimated; when  $aMAPE < 0$ , precipitation is underestimated.

**28. L299: What is the vertical resolution of the simulations? I mean how many levels are included between 3 km and 5 km?**

**A:** In the GRAPES/CUACE model configuration used in this study, the atmosphere is divided into 32 vertical layers. Within the height range of 3–5 km, there are four model layers, located approximately at 3.11 km, 3.67 km, 4.25 km, and 4.86 km.

**29. Figures 2a-c: Please introduce how to calculate the IN number. Is it the number of dust particles with diameter exceeding 0.5  $\mu\text{m}$ ?**

**A:** Thank you for the comment. The IN number in Figures 2a and 2b is not defined as the number of dust particles larger than 0.5  $\mu\text{m}$ . Instead, it represents the activated ice-nucleating particle (IN) concentration, which is calculated in Equations (1), (2) and (3).

We have revised the original writing into line 330-338:

During the DP event, the implemented on-line aerosol–IN nucleation scheme enables dust aerosols to modify the nucleated IN number concentration. Figures 2a and 2b show the horizontal distribution of the maximum nucleated IN number concentration between 4 and 7 km above ground level at DP stations during the time period from 00:00 UTC on 11 April to 00:00 UTC on 15 April 2018 for T\_CTL and T\_IN, respectively. Figure 2c presents the vertical distribution of DP-event-averaged production rate for Nigen for T\_CTL (red line) and T\_IN (blue line). Figure 2d presents the vertical distribution of cloud ice mass production rate for heterogeneous ice nucleation for T\_CTL and T\_IN.

30. **Figure 2d: I don't understand the label of x-axis. Is it the IN nucleation rate? If so, the unit of nucleation rate should be #/kg/s (number of newly nucleated ice crystal per second) or g/kg/s (mass of newly nucleated ice crystal per second). Furthermore, the authors are encouraged to compare the nucleation rate of different types of regimes, such as deposition nucleation, condensation freezing, immersion freezing, and homogeneous freezing.**

**A:** Yes, you are right. We have revised the figure to clarify that it represents the heterogeneous nucleation rate, and we have updated the units to g/kg/s, which is more appropriate.

And regarding the comparison among different freezing regimes, the immersion freezing process is indeed the dominant heterogeneous nucleation mechanism. Based on our simulations, the mass growth rate of deposition nucleation and condensation freezing together is only about 4–5 orders of magnitude of that of immersion freezing. As for homogeneous freezing, it occurs essentially instantaneously and is not explicitly represented by a separate nucleation rate parameter.

We have added the following explanation into the line 363-366:

Moreover, immersion freezing is the dominant heterogeneous nucleation mechanism, exceeding deposition and condensation freezing by 4–5 orders of

magnitude in DP-event-averaged production rate for nucleated IN number concentration and 5–6 orders of magnitude in production rate of cloud ice.

**31. Figures 2c-d: The figure title mentioned the results are from T\_CCN and T\_IN, but the legends in both panels show T\_CTL and T\_IN.**

**A:** Thank you for pointing out this inconsistency. We have corrected the figure titles and clarified the experiment definitions to ensure consistency throughout the manuscript.

In the revised manuscript, we use T\_CTL and T\_IN consistently. Here, T\_CTL represents the control experiment in which aerosols affect cloud condensation nuclei (CCN) only, which corresponds to the T\_CCN experiment in the original version. T\_IN represents the experiment in which aerosols affect both CCN and ice nuclei (IN) through the online aerosol–IN nucleation scheme, allowing us to isolate the impact of dust–IN interactions on cloud microphysics and precipitation.

**32. I didn't find discussion or explanation about Figure 2 but only introduction of the figures at L298-305.**

**A:** Thank you for this comment. We agree that the original manuscript mainly described Figure 2 without sufficient physical interpretation. In the revised manuscript, we have added a dedicated discussion of Figure 2 in Section 3.1.

We have revised the original writing into line 330-338:

During the DP event, the implemented on-line aerosol–IN nucleation scheme enables dust aerosols to modify the nucleated IN number concentration. Figures 2a and 2b show the horizontal distribution of the maximum nucleated IN number concentration between 4 and 7 km above ground level at DP stations during the time period from 00:00 UTC on 11 April to 00:00 UTC on 15 April 2018 for T\_CTL and T\_IN, respectively. Figure 2c presents the vertical distribution of DP-event-averaged production rate for Nigen for T\_CTL (red line) and T\_IN (blue line). Figure 2d presents the vertical distribution of cloud ice mass production rate for heterogeneous ice nucleation for T\_CTL and T\_IN.

**33. Figures 3 and 4: What does “event averaged hydrometeors” mean in the figure title? And it should be “averaged mass concentration of different types of hydrometeors” instead of “averaged hydrometeor”.**

**A:** Thank you for pointing this out. You are correct that the original wording was unclear. In this study, “event-averaged hydrometeors” refers to the time-averaged mass concentrations of different hydrometeor species during dust–precipitation (DP) events, rather than a single hydrometeor quantity.

Specifically, the averaging is performed over stations influenced by dust (defined by  $PM_{2.5}/PM_{10} < 0.6$ ) and with precipitation amounts greater than 0.1 mm, focusing on the vertical distributions of hydrometeor mass concentrations during DP events.

To avoid ambiguity, we have revised the figure titles to “event-averaged mass concentrations of different types of hydrometeors”, which more accurately reflects the content shown in Figures 3 and 4.

**34. Figure 4: What does Qv stand for? Is that water vapor mixing ratio? The water vapor is not a kind of hydrometeors, and the Qv profiles were not referred in the main text.**

**A:** Thank you for this comment. Qv denotes the water vapor mixing ratio. We agree with the reviewer that water vapor is not a hydrometeor and that the Qv profiles were not explicitly discussed in the original manuscript.

Since this study focuses on the impacts of dust aerosols on cloud hydrometeors and precipitation, the inclusion of Qv in Figure 4 was not essential. Therefore, we have removed the Qv profiles from Figure 4 and revised the figure accordingly. All references to Figure 4 have been updated to ensure consistency with the revised content.

**35. L337-339: What is the reason for higher temperature in T\_IN case than the other 2 cases? Moreover, how does the temperature change of 0.1-0.5 °C lead to so remarkable**



reduction of ice crystal mixing ratio? The authors are suggested to explain this question in more detail. And if the warmer environment is the reason for the reduced mass of ice crystal, the IN nucleation rate should be decreased, rather than increased at 4–6 km compared between T\_IN and T\_CTL as shown in Figure 2d. Moreover, why did IN nucleation occur below 4 km with temperature above 0 °C? It does not make sense.

**A:** Thank you for this insightful comment. We agree that the relationship between temperature changes, ice nucleation, and cloud-ice mass requires careful clarification.

After re-examining the thermodynamic and microphysical budgets, we find that although individual microphysical processes (e.g., deposition, riming, heterogeneous nucleation, and evaporation) contribute differently to heating or cooling tendencies, the net temperature differences between T\_IN and the other experiments remain small (on the order of 0.1–0.5 °C). Therefore, these temperature differences alone cannot directly explain the substantial changes in cloud-ice mass concentration.

Taking the 4–6 km layer as an example, warming-related microphysical processes include snow deposition ( $P_{sdep}$ ), graupel deposition ( $P_{gdep}$ ), ice deposition ( $P_{idep}$ ), accretion processes ( $P_{sacr}$ ,  $P_{gacr}$ ,  $P_{iacr}$ ), rain accretion ( $P_{aacw}$ ), and heterogeneous ice nucleation ( $P_{igen}$ ), while evaporative cooling is mainly associated with rain evaporation ( $P_{revp}$ ). Although the combined heating rates from these processes in T\_IN are approximately 70%–95% of those in T\_CTL, the resulting temperature changes remain about  $-0.002$  °C due to cloud microphysics. This indicates that microphysical heating is not the dominant driver of the reduced cloud-ice mass.

Accordingly, we have removed the previous discussion that attributed cloud-ice reduction primarily to temperature changes and revised the manuscript to emphasize that the dominant mechanism is the suppression of depositional growth due to increased ice number concentration, rather than thermodynamic warming.

**36. L344:** I can not find in Figure 4 at which level the mass concentration of ice crystal is reduced up to 0.1 g/kg. The maximum value of  $Q_i$  is smaller than 0.05 g/kg as shown in Figure 3.

**A:** Thank you for this insightful comment.

During the revision, we reprocessed the model output by increasing the temporal resolution from 3-hourly to 1-hourly output and reanalyzed the vertical distributions of hydrometeor mass concentrations, cloud-ice number concentrations, and ice nuclei concentrations. Based on the updated analysis, the maximum reduction in cloud-ice mass concentration occurs at approximately 8 km above ground level, with a decrease of about  $0.025 \text{ g kg}^{-1}$ , corresponding to roughly 15% of the cloud-ice mass concentration in T\_CTL, rather than  $0.1 \text{ g kg}^{-1}$ !

We have corrected the relevant description in the manuscript to ensure consistency with Figures 3 and 4 and removed the inaccurate value reported previously.

**37. L345-347:** Here the authors mentioned that “cloud ice increases” but in the last sentence they just wrote “cloud ice mixing ratio decreases by...”. I am very confused about the inconsistency of the expressions.

**A:** Thank you for pointing out this inconsistency. We agree that the original wording was unclear and potentially misleading because it did not clearly distinguish between cloud ice number concentration and cloud ice mass (mixing ratio). In the revised manuscript, we have clarified the expressions by explicitly specifying whether we refer to cloud ice number concentration or cloud ice mixing ratio in each case.

**38. L356-359:** I don’t understand what does cloud ice “transforms into cloud water” mean? Is it melting of cloud ice into liquid water? if so, the height for the increment of cloud water should be below  $0^\circ\text{C}$  layer for melting occurs. But the difference in  $Q_c$  peaks above  $0^\circ\text{C}$  layer for phase 1 (Figure 4a, d). Please clarify it.

**A:** During the revision, we reprocessed the model output by increasing the temporal resolution from 3-hourly to 1-hourly output and reanalyzed the vertical distributions of hydrometeor mass concentrations as well as cloud-ice and ice-nuclei number concentrations. Based on the updated analysis, we find that cloud water mixing ratio in T\_IN is reduced to 90%-95% of that in T\_CTL the 0–4 km layer, rather than increased. This reduction is mainly caused by dust suppressing the production rate for cloud droplet activation from CCN in warm clouds (p<sub>act</sub>), which decreases by about 5% in T\_IN relative to T\_CTL.

**39. L362-363: Please provide enough evident for competing available water vapor between INs and CCNs, such as comparing the diffusion growth rate of cloud droplet and ice crystal.**

**A:** Thank you for this comment. We agree that clearer evidence is needed to support the competition for available water vapor between INs and CCNs.

After introducing the on-line aerosol–IN nucleation scheme, we re-examined the cloud microphysical budgets. The results show that the CCN-driven droplet activation and condensational growth in warm clouds are indeed weakened. Specifically, CCN-driven cloud droplet activation from CCN (P<sub>act</sub>) in T\_IN decreases by about 5% compared to T\_CTL, indicating that less water vapor is converted into cloud water. Cloud water mixing ratio in T\_IN is reduced to 90%-95% of that in T\_CTL the 0–4 km layer

**40. Figures 3 and 4 show the vertical profile of mixing ratio of graupel. But it seems not referred in the main text.**

**A:** Thank you for the comment. We agree that graupel mixing ratio is shown in Figures 3 and 4 but was not explicitly discussed in the original text.

In our simulations, the graupel mixing ratio is substantially smaller than those of cloud ice and snow throughout the vertical column. During the dust–precipitation

event, graupel is mainly distributed around 5–6 km, and its change in T\_IN relative to T\_CTL is modest, remaining within approximately 90%–100% of T\_CTL. Compared with the pronounced responses of cloud ice and snow, the contribution of graupel to the overall hydrometeor budget and precipitation response is therefore relatively minor.

For this reason, the discussion in the manuscript focuses on cloud ice, snow, cloud water, and rainwater, which exhibit much stronger sensitivity to the aerosol–IN nucleation scheme.

**41. Figure 6: It seems that the improvement of CCN or IN nucleation contributes insignificantly to the changes in precipitation pattern. The inherent defects of the numerical model (e.g., microphysics, dynamics, or the initial and boundary conditions) may play more important role in the evolution of cloud field and spatial distribution of precipitation.**

**A:** Thank you for this insightful comment. We agree that the improvement of CCN or IN nucleation alone does not lead to a dramatic change in the large-scale precipitation pattern, and that uncertainties associated with model dynamics, microphysics, and initial and boundary conditions can play an important role in shaping the spatial distribution of precipitation.

From a cloud-microphysical perspective, this limited precipitation response is physically consistent with our results. Although the on-line aerosol–IN nucleation scheme modifies cloud microphysical processes, the magnitude of these changes remains relatively small in the lower troposphere, where precipitation forms. Specifically, in T\_IN, the cloud water and rainwater mixing ratios below 4 km are reduced by only about 5–10% compared to T\_CTL. Such modest reductions in liquid-phase hydrometeors lead to correspondingly small changes in surface precipitation.

This behavior is consistent with previous modeling studies (e.g., Park and Lim, 2023), which also reported that dust only had a weak influence on precipitation amount and pattern. Therefore, our results suggest that dust aerosols primarily

modulate cloud microphysical structures rather than acting as a dominant control on precipitation distribution during this event.

We have clarified this point in the revised manuscript to better distinguish between microphysical impacts and precipitation-scale responses in line 506-512:

In summary, because the reduction in cloud water in the 0–4 km layer is relatively small, the corresponding decrease in rainwater reaching the surface is also limited. As a result, the on-line aerosol–IN nucleation scheme exerts only a weak influence on the total precipitation amount. Nevertheless, it can modulate the spatial and temporal distribution of precipitation, impressing overestimated and altering underestimation in a degree, which is consistent with the findings of Park and Lim (2023) and Su and Fung (2018b).

**42. L403-404: From which figure the authors found “the suppressed cloud water is transported downstream in T\_IN”?**

**A:** Thank you for this question. The statement regarding downstream transport of suppressed cloud water is not inferred directly from Figures 3 or 4, but from an additional diagnostic analysis of hydrometeor fluxes in line 482-497:

We calculate horizontal hydrometeor fluxes across 116 °E, 33 °–50 °N and 33 °N, 103 °–116 °E from 12:00 UTC on 12 April to 18:00 UTC on 13 April (Fig. 6). Over the entire 0–12 km layer, the total hydrometeor flux slightly increases to about 102% of that in T\_CTL.

Within the temperature range from 0 to -40 °C, the total horizontal hydrometeor flux decreases by about 11 %, primarily due to a substantial reduction in cloud ice flux, accompanied by increases in snow and graupel fluxes. In Layer A, the total hydrometeor flux is about  $4.4 \times 10^{-5} \text{ kg s}^{-1}$ , corresponding to about 75 % of T\_CTL. Cloud ice flux drops sharply to about 8 % of T\_CTL, while snow and graupel fluxes increase markedly to about 19.8 times and 7.8 times, respectively. In Layer B, the

total hydrometeor flux is about  $2.6 \times 10^{-6} \text{ kg s}^{-1}$ , corresponding to about 93 % of T\_CTL, with cloud ice flux reduced to about 28 % of T\_CTL, and snow and graupel fluxes increased to about 2.3 times and about 1.8 times, respectively. At temperatures above 0 °C, the total horizontal hydrometeor flux increases to about 106 % of T\_CTL, with cloud water and rainwater fluxes increasing to about 115 % and about 108 %, respectively.

**43. L419-422: The authors are suggested to explain this results in more detail.**

**A:** Thank you for this comment. Under the influence of dust, in 0–4 km, the production rate for cloud droplet activation from CCN (P<sub>CACT</sub>) in T\_IN decreases by about 5% relative to T\_CTL, indicating that less water vapor is converted into cloud water. As a result, the cloud water mixing ratio in T\_IN is reduced to approximately 90%–95% of that in T\_CTL within the 0–4 km layer.

Because the reduction in cloud water is relatively small, the corresponding decrease in rainwater reaching the surface is also limited, leading to only a weak response of surface precipitation to dust perturbations. This behavior is consistent with previous studies (Park and Lim, 2023; Su and Fung, 2018b).

In summary, because the reduction in cloud water in the 0–4 km layer is relatively small, the corresponding decrease in rainwater reaching the surface is also limited. As a result, the on-line aerosol–IN nucleation scheme exerts only a weak influence on the total precipitation amount. Nevertheless, it can modulate the spatial and temporal distribution of precipitation, which is consistent with the findings of Park and Lim (2023) and Su and Fung, (2018).

**44. L436: I can't find from which figure the authors reached the conclusion that "IN concentrations reached 103-104 L<sup>-1</sup> between 3 and 5 km altitude". Figure 2c shows the maximum number concentration is between 102 and 103 L<sup>-1</sup>.**

**A:** Thank you for pointing this out. The confusion arises from an unclear distinction between maximum and event-averaged IN number concentrations in the original manuscript.

Figures 2a and 2b show the maximum nucleated IN number concentrations between 3 and 5 km during the dust–precipitation event, whereas Figure 2c presents the event-averaged vertical profiles of IN concentrations over all DPA stations. As a result, the peak values shown in T\_IN can reach  $10^3$ – $10^4$  L<sup>-1</sup>, while the peak values shown in T\_IN can reach  $10^0$ – $10^1$  L<sup>-1</sup>.

**45. L430-438: I did not find the discussion related to the number concentration of IN in Section 3 Results.**

**A:** Thank you for pointing this out. We agree that the discussion of IN number concentration was not sufficiently explicit in the original version of Section 3.1.

In the revised manuscript, we have clarified and strengthened the discussion of IN number concentration by explicitly describing its vertical distribution, magnitude, and differences among experiments (T\_CTL, and T\_IN), particularly in relation to Figure 2.

**46. L440-441: Please explain why “dust suppresses the formation of ice-phase hydrometeors”?**

**A:** Thank you for this important question. The mechanisms by which dust suppresses ice-phase hydrometeor formation differ across vertical layers, mainly due to distinct thermodynamic conditions and dominant microphysical processes.

Above 7 km (temperatures below  $-17$  °C), the introduction of the online aerosol – IN nucleation scheme leads to a decrease in IN number concentration in T\_IN compared to T\_CTL (Fig. 2c). As a result, cloud-ice number concentrations in

T\_IN are approximately  $5 \text{ L}^{-1}$  lower than in T\_CTL, corresponding to about 70% of T\_CTL (Fig. 3d), while the cloud-ice mass concentration is reduced to only 10% – 50% of T\_CTL (Fig. 3a,b). This reduction is primarily caused by a strong suppression of the total cloud-ice formation processes—heterogeneous ice nucleation (Pigen) and vapor deposition growth of cloud ice (Pidep)— in this layer, which decreases to less than 24% of that in T\_CTL. On the one hand, the reduced IN number concentration directly weakens Pigen by 1–2 orders of magnitude relative to T\_CTL. On the other hand, the lower cloud-ice number concentration allows ice crystals to grow to larger sizes, with effective diameters reaching 98%–135% of those in T\_CTL. This shift toward fewer but larger ice crystals reduces the total surface area available for vapor deposition, thereby limiting the overall efficiency of Pidep. Consequently, Pidep decreases to 20%–50% of T\_CTL, with the strongest suppression occurring near 7–8 km.

Between 4 and 7 km (temperatures approximately  $-17^\circ\text{C}$  to  $-2^\circ\text{C}$ ), the enhanced activation of ice nuclei in T\_IN leads to an increase in cloud-ice number concentration through stronger heterogeneous ice nucleation. However, the resulting increase in ice crystal number causes a pronounced decrease in effective diameters of cloud ice which decreases to only 77%–97% of T\_CTL. The smaller ice crystals grow less efficiently by vapor deposition, substantially suppressing Pidep and limiting the accumulation of ice-phase mass despite the higher ice crystal number concentration.

In summary, dust aerosols suppress the formation of ice-phase hydrometeors through different mechanisms at different altitudes: by reducing both ice nucleation and deposition growth in the upper troposphere, and by enhancing ice number concentration but inhibiting depositional growth efficiency in the mid-troposphere. These combined effects ultimately lead to a net reduction in ice-phase hydrometeor mass.



**47. L442-444: I can't understand this sentence. First, why does "higher cloud-top temperature" and "more small-sized ice-phase cloud particles"? The warm environment should suppress the IN nucleation. Second, why "both of which could limit ice-phase hydrometeor development"? Does "ice-phase hydrometeor" include "ice-phase cloud particles"? It makes me confused.**

**A:** Thank you for pointing out this ambiguity. We agree that the original sentence was unclear and could lead to misunderstanding. We have revised the text to clarify both the physical meaning and terminology. The main points are explained as follows.

First, the term "higher cloud-top temperature" does not imply that a warmer environment directly enhances ice nucleation. Instead, it reflects a secondary thermodynamic response to changes in cloud microphysical processes. As discussed in question 34, the differences in temperature among the experiments are small (on the order of 0.1–0.5 °C) and do not control the ice-nucleation rate. The enhanced ice nucleation at 4–7 km in T\_IN is driven by increased availability of ice-nucleating particles, rather than by temperature changes.

Second, the phrase "more small-sized ice-phase cloud particles" refers to the microphysical consequence of enhanced heterogeneous ice nucleation. The increase in activated IN between 4 and 7 km (temperature approximately –17 °C to –2 °C) leads to a larger number of ice crystals, but with reduced effective diameters of cloud ice to only 77%–97% of T\_CTL. This size reduction suppresses depositional growth efficiency and limits the accumulation of ice-phase mass, even though ice crystal number concentration increases.

Third, in this study, the term "ice-phase hydrometeors" refers to the sum of the cloud ice and snow. To avoid confusion, we have rewritten the sentence by removing the misleading reference to cloud-top temperature and by explicitly distinguishing between ice crystal number concentration and ice-phase mass. The revised text now emphasizes that dust affects ice-phase clouds mainly through microphysical pathways

associated with ice crystal size and depositional growth, rather than through direct temperature effects.

**48. L453-456: Please explain how “increasing production rate for nucleation of ice suppress the precipitation”. Moreover, what is the relationship between suppressed precipitation and reduced cloud and rain water? Please state it in more detail.**

**A:** Thank you for this comment.

Cloud water and rainwater are mainly distributed in layer c (temperature approximately  $-2^{\circ}\text{C}$  to  $18^{\circ}\text{C}$ ). In this layer, both cloud-water and rainwater mixing ratios in T\_IN are 90%-95% of those in T\_CTL by approximately. This reduction is primarily attributed to a weakening of the production rate for cloud droplet activation from CCN ( $P_{\text{act}}$ ), which decreases by about 5% in T\_IN relative to T\_CTL, indicating a suppressed conversion of water vapor into liquid water. As a consequence of the reduced cloud-water content, the production rate for accretion of cloud rain by cloud water ( $P_{\text{acw}}$ ) are also weakened, with reductions of approximately 5%–10%. Meanwhile, the conversion of rainwater into ice-phase hydrometeors ( $P_{\text{saci}}$ ,  $P_{\text{gaci}}$ , and  $P_{\text{iaci}}$ ) is enhanced. However, under the thermodynamic conditions of layer c, temperatures exceed the melting thresholds of ice-phase hydrometeors, and newly formed snow and graupel rapidly melt and are converted back into rainwater. Consequently, dusts lead to a limited reduction in surface precipitation.

### **Related References**

Cantrell, W., Bunker, K., Niehaus, J., China, S., Woodward, X., Kostinski, A., and Mazzoleni, C.: Ice nucleation in the contact mode: Temperature and size dependence for selected dusts, AIP Conference Proceedings, 1527, 926, <https://doi.org/10.1063/1.4803423>, 2013.

Chen, J., Wu, Z., Chen, J., Reicher, N., Fang, X., Rudich, Y., and Hu, M.: Size-resolved atmospheric ice-nucleating particles during East Asian dust events,

Atmospheric Chemistry and Physics, 21, 3491–3506,  
<https://doi.org/10.5194/acp-21-3491-2021>, 2021.

Chen, Q., Yin, Y., Jiang, H., Chu, Z., Xue, L., Shi, R., Zhang, X., and Chen, J.: The Roles of Mineral Dust as Cloud Condensation Nuclei and Ice Nuclei During the Evolution of a Hail Storm, *Journal of Geophysical Research Atmospheres*, 124, <https://doi.org/10.1029/2019JD031403>, 2019.

DeMott, P. J., Prenni, A. J., McMeeking, G. R., Sullivan, R. C., Petters, M. D., Tobo, Y., Niemand, M., Möhler, O., Snider, J. R., Wang, Z., and Kreidenweis, S. M.: Integrating laboratory and field data to quantify the immersion freezing ice nucleation activity of mineral dust particles, *Atmospheric Chemistry and Physics*, 15, 393–409, <https://doi.org/10.5194/acp-15-393-2015>, 2015.

DeMott, P. J., Hill, T. C. J., Petters, M. D., Bertram, A. K., Tobo, Y., Mason, R. H., Suski, K. J., McCluskey, C. S., Levin, E. J. T., Schill, G. P., Boose, Y., Rauker, A. M., Miller, A. J., Zaragoza, J., Rocci, K., Rothfuss, N. E., Taylor, H. P., Hader, J. D., Chou, C., Huffman, J. A., Pöschl, U., Prenni, A. J., and Kreidenweis, S. M.: Comparative measurements of ambient atmospheric concentrations of ice nucleating particles using multiple immersion freezing methods and a continuous flow diffusion chamber, *Atmospheric Chemistry and Physics*, 17, 11227–11245, <https://doi.org/10.5194/acp-17-11227-2017>, 2017.

Eastwood, M. L., Cremel, S., Gehrke, C., Girard, E., and Bertram, A. K.: Ice nucleation on mineral dust particles: Onset conditions, nucleation rates and contact angles, *Journal of Geophysical Research: Atmospheres*, 113, <https://doi.org/10.1029/2008JD010639>, 2008.

Haarig, M., Ansmann, A., Walser, A., Baars, H., Urbanneck, C., Weinzierl, B., Schöberl, M., Dollner, M., Mamouri, R., and Althausen, D.: Estimation of dust related ice nucleating particles in the atmosphere: Comparison of profiling and

in-situ measurements, E3S Web Conf., 99, 04002,  
<https://doi.org/10.1051/e3sconf/20199904002>, 2019.

Han, Y., CHEN, Y., Fang, X., and Zhao, T.: The possible effect of dust aerosol on precipitation in Tarim basin., China Environmental Science, 2008, 5 ( 102-106 ),  
<https://doi.org/10.3321/j.issn:1000-6923.2008.02.002>, 2008.

He, C., Yin, Y., Huang, Y., Kuang, X., Cui, Y., Chen, K., Jiang, H., Kiselev, A., Möhler, O., and Schrod, J.: The Vertical Distribution of Ice-Nucleating Particles over the North China Plain: A Case of Cold Front Passage, Remote Sensing, 15, 4989, <https://doi.org/10.3390/rs15204989>, 2023.

He, Y., Zhang, Y., Liu, F., Yin, Z., Yi, Y., Zhan, Y., and Yi, F.: Retrievals of dust-related particle mass and ice-nucleating particle concentration profiles with ground-based polarization lidar and sun photometer over a megacity in central China, Atmospheric Measurement Techniques, 14, 5939–5954,  
<https://doi.org/10.5194/amt-14-5939-2021>, 2021.

Hiranuma, N., Augustin-Bauditz, S., Bingemer, H., Budke, C., Curtius, J., Danielczok, A., Diehl, K., Dreischmeier, K., Ebert, M., Frank, F., Hoffmann, N., Kandler, K., Kiselev, A., Koop, T., Leisner, T., Möhler, O., Nillius, B., Peckhaus, A., Rose, D., Weinbruch, S., Wex, H., Boose, Y., DeMott, P. J., Hader, J. D., Hill, T. C. J., Kanji, Z. A., Kulkarni, G., Levin, E. J. T., McCluskey, C. S., Murakami, M., Murray, B. J., Niedermeier, D., Petters, M. D., O’Sullivan, D., Saito, A., Schill, G. P., Tajiri, T., Tolbert, M. A., Welti, A., Whale, T. F., Wright, T. P., and Yamashita, K.: A comprehensive laboratory study on the immersion freezing behavior of illite NX particles: a comparison of 17 ice nucleation measurement techniques, Atmospheric Chemistry and Physics, 15, 2489–2518, <https://doi.org/10.5194/acp-15-2489-2015>, 2015.

Hu, Y., Tian, P., Huang, M., Bi, K., Schneider, J., Umo, N. S., Ullmerich, N., Höhler, K., Jing, X., Xue, H., Ding, D., Liu, Y., Leisner, T., and Möhler, O.:

Characteristics of ice-nucleating particles in Beijing during spring: A comparison study of measurements between the suburban and a nearby mountain area, *Atmospheric Environment*, 293, 119451, <https://doi.org/10.1016/j.atmosenv.2022.119451>, 2023.

Iltoviz, E., Khain, A. P., Benmoshe, N., Phillips, V. T. J., and Ryzhkov, A. V.: Effect of Aerosols on Freezing Drops, Hail, and Precipitation in a Midlatitude Storm, *Journal of the Atmospheric Sciences*, 73, 109–144, <https://doi.org/10.1175/JAS-D-14-0155.1>, 2016.

Jiang, H., Yin, Y., Wang, X., Gao, R., Yuan, L., Chen, K., and Shan, Y.: The measurement and parameterization of ice nucleating particles in different backgrounds of China, *Atmospheric Research*, 181, 72–80, <https://doi.org/10.1016/j.atmosres.2016.06.013>, 2016.

Kaufman, Y. J., Tanré D., and Boucher, O.: A satellite view of aerosols in the climate system, *Nature*, 419, 215–223, <https://doi.org/10.1038/nature01091>, 2002.

Lee, S. S., Kim, B.-G., Yum, S. S., Seo, K.-H., Jung, C.-H., Um, J. S., Li, Z., Hong, J., Chang, K.-H., and Jeong, J.-Y.: Effects of aerosol on evaporation, freezing and precipitation in a multiple cloud system, *Clim Dyn*, 48, 1069–1087, <https://doi.org/10.1007/s00382-016-3128-1>, 2017.

Liu, H., Yu, Y., Xia, D., Zhao, S., Ma, X., and Dong, L.: Analysis of the relationship between dust aerosol and precipitation in spring over East Asia using EOF and SVD methods, *Science of The Total Environment*, 908, 168437, <https://doi.org/10.1016/j.scitotenv.2023.168437>, 2024.

Morrison, H. and Gettelman, A.: A New Two-Moment Bulk Stratiform Cloud Microphysics Scheme in the Community Atmosphere Model, Version 3 (CAM3). Part I: Description and Numerical Tests, <https://doi.org/10.1175/2008JCLI2105.1>, 2008.

- Naeger, A. R.: Impact of dust aerosols on precipitation associated with atmospheric rivers using WRF-Chem simulations, *Results in Physics*, 10, 217–221, <https://doi.org/10.1016/j.rinp.2018.05.027>, 2018.
- Niehaus, J., Becker, J. G., Kostinski, A., and Cantrell, W.: Laboratory Measurements of Contact Freezing by Dust and Bacteria at Temperatures of Mixed-Phase Clouds, <https://doi.org/10.1175/JAS-D-14-0022.1>, 2014.
- Pan, X., Uno, I., Wang, Z., Nishizawa, T., Sugimoto, N., Yamamoto, S., Kobayashi, H., Sun, Y., Fu, P., Tang, X., and Wang, Z.: Real-time observational evidence of changing Asian dust morphology with the mixing of heavy anthropogenic pollution, *Sci Rep*, 7, 335, <https://doi.org/10.1038/s41598-017-00444-w>, 2017.
- Park, S.-Y. and Lim, K.-S. S.: Implementation of Prognostic Cloud Ice Number Concentrations for the Weather Research and Forecasting (WRF) Double-Moment 6-Class (WDM6) Microphysics Scheme, *Journal of Advances in Modeling Earth Systems*, 15, e2022MS003009, <https://doi.org/10.1029/2022MS003009>, 2023.
- Patnaude, R. J., McCluskey, C. S., Roberts, G. C., DeMott, P. J., Hill, T. C. J., McFarquhar, G. M., Kollias, P., Ranjbar, K., Wolde, M., and Kreidenweis, S. M.: Characteristics of Ice Nucleating Particles From the Long-Range Transport of Saharan Dust, *Geophysical Research Letters*, 52, e2024GL113365, <https://doi.org/10.1029/2024GL113365>, 2025.
- Possner, A., Ekman, A. M. L., and Lohmann, U.: Cloud response and feedback processes in stratiform mixed-phase clouds perturbed by ship exhaust, *Geophysical Research Letters*, 44, 1964–1972, <https://doi.org/10.1002/2016GL071358>, 2017.
- Reisner, J., Rasmussen, R. M., and Bruintjes, R. T.: Explicit forecasting of supercooled liquid water in winter storms using the MM5 mesoscale model,

Quarterly Journal of the Royal Meteorological Society, 124, 1071–1107,  
<https://doi.org/10.1002/qj.49712454804>, 1998.

Rosenfeld, D. and Bell, T. L.: Why do tornados and hailstorms rest on weekends?,  
Journal of Geophysical Research: Atmospheres, 116,  
<https://doi.org/10.1029/2011JD016214>, 2011.

Stier, P., van den Heever, S. C., Christensen, M. W., Gryspeerdt, E., Dagan, G.,  
Saleeby, S. M., Bollasina, M., Donner, L., Emanuel, K., Ekman, A. M. L.,  
Feingold, G., Field, P., Forster, P., Haywood, J., Kahn, R., Koren, I.,  
Kummerow, C., L'Ecuyer, T., Lohmann, U., Ming, Y., Myhre, G., Quaas, J.,  
Rosenfeld, D., Samset, B., Seifert, A., Stephens, G., and Tao, W.-K.:  
Multifaceted aerosol effects on precipitation, Nat. Geosci., 17, 719–732,  
<https://doi.org/10.1038/s41561-024-01482-6>, 2024.

Su, L. and Fung, J. C. H.: Investigating the role of dust in ice nucleation within clouds  
and further effects on the regional weather system over East Asia – Part 2:  
modification of the weather system, Atmospheric Chemistry and Physics, 18,  
11529–11545, <https://doi.org/10.5194/acp-18-11529-2018>, 2018.

Tobo, Y., Adachi, K., DeMott, P. J., Hill, T. C. J., Hamilton, D. S., Mahowald, N. M.,  
Nagatsuka, N., Ohata, S., Uetake, J., Kondo, Y., and Koike, M.: Glacially  
sourced dust as a potentially significant source of ice nucleating particles, Nat.  
Geosci., 12, 253–258, <https://doi.org/10.1038/s41561-019-0314-x>, 2019.

Um, J., McFarquhar, G. M., Stith, J. L., Jung, C. H., Lee, S. S., Lee, J. Y., Shin, Y.,  
Lee, Y. G., Yang, Y. I., Yum, S. S., Kim, B.-G., Cha, J. W., and Ko, A.-R.:  
Microphysical characteristics of frozen droplet aggregates from deep convective  
clouds, Atmospheric Chemistry and Physics, 18, 16915–16930,  
<https://doi.org/10.5194/acp-18-16915-2018>, 2018.

- Wang, W.: Observation and study on the transport of dust aerosol and its climate effect., Doctoral dissertation, Lanzhou University, 2013.
- Yang, J., Hu, X., Lei, H., Duan, Y., Lv, F., and Zhao, L.: Airborne Observations of Microphysical Characteristics of Stratiform Cloud Over Eastern Side of Taihang Mountains, *Chinese Journal of Atmospheric Sciences*, 45(1), 88–106, 2021.
- Zhang, Y., Yu, F., Luo, G., Fan, J., and Liu, S.: Impacts of long-range-transported mineral dust on summertime convective cloud and precipitation: a case study over the Taiwan region, *Atmospheric Chemistry and Physics*, 21, 17433–17451, <https://doi.org/10.5194/acp-21-17433-2021>, 2021.
- Zhou, C., Zhang, X., Gong, S., Wang, Y., and Xue, M.: Improving aerosol interaction with clouds and precipitation in a regional chemical weather modeling system, *Atmospheric Chemistry and Physics*, 16, 145–160, <https://doi.org/10.5194/acp-16-145-2016>, 2016.
